# Supplementary material for: The Janus Role of Adhesion in Chondrogenesis
Source: MDPI journal article supplement (doi:10.3390/ijms21155269), 2020-07-24
Supplement: s1 [file s1]

## The Janus role of adhesion in chondrogenesis

**Ignasi Casanellas<sup>1,2,3</sup>, Anna Lagunas<sup>3,1,\*</sup>, Yolanda Vida<sup>4,5</sup>, Ezequiel Pérez-Inestrosa<sup>4,5</sup>, José A. Andrades<sup>6,3</sup>, José Becerra<sup>6,3,5</sup> and Josep Samitier<sup>1,2,3</sup>**

<sup>1</sup> Institute for Bioengineering of Catalonia (IBEC), Barcelona Institute of Science and Technology (BIST), 08028 Barcelona, Spain; icasanellas@ibecbarcelona.eu (I.C.); alagunas@ibecbarcelona.eu (A.L.); samitier@ibecbarcelona.eu (J.S.)

<sup>2</sup> Department of Electronics and Biomedical Engineering, University of Barcelona (UB), 08028 Barcelona, Spain

<sup>3</sup> Networking Biomedical Research Center in Bioengineering, Biomaterials and Nanomedicine (CIBER-BBN), 28029 Madrid, Spain

<sup>4</sup> Universidad de Málaga-IBIMA, Departamento de Química Orgánica, 29071 Málaga, Spain; yolvida@uma.es (Y.V.); inestrosa@uma.es (E.P.-I.)

<sup>5</sup> Centro Andaluz de Nanomedicina y Biotecnología-BIONAND, 29590 Campanillas, Málaga, Spain

<sup>6</sup> Department of Cell Biology, Genetics and Physiology, Universidad de Málaga-IBIMA, 29071 Málaga, Spain; andrades@uma.es (J.A.A.); becerra@uma.es (J.B.)

\*Correspondence: [alagunas@ibecbarcelona.eu](mailto:alagunas@ibecbarcelona.eu)

### Supplementary Materials and Methods

#### *Cell viability assay*

Cells were cultured on nanopatterned or fibronectin-coated substrates as described in the Materials and Methods section. A commercial viability/cytotoxicity cell labelling kit was used for the assay (ThermoFisher, L3224). At day 7 of chondrogenesis, samples were washed twice with PBS and stained with calcein AM and ethidium homodimer-1 at 4 µM in non-serum containing medium for 40 min at 37°C and 5% CO<sub>2</sub>. Samples were washed twice with PBS, mounted on microscopy slides, and immediately imaged in a Leica SPE Upright Confocal Microscope (Leica Microsystems) with a 40X objective. Z-projections of cell condensates were produced with Fiji software.

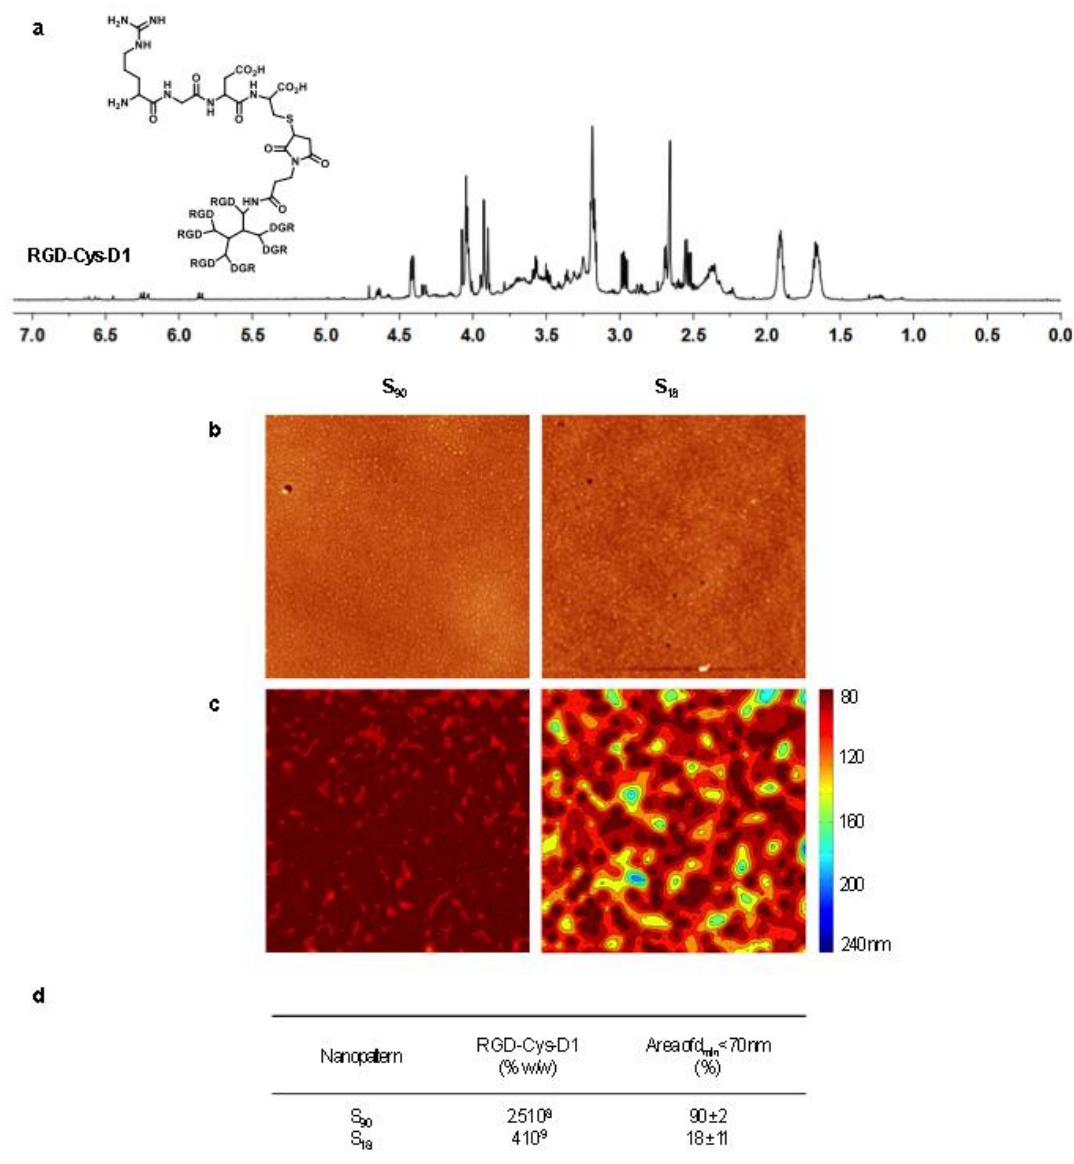

**Figure S1.** Nanopatterns of high and low local surface adhesiveness. (a)  $^1\text{H}$ -NMR spectra of RGD-Cys-D1, in  $\text{D}_2\text{O}$ . Signals between 1.5 and 2.0 ppm were attributed to internal signals of the arginine (R) moiety. The remaining RGD-Cys signals overlapped those corresponding to the dendrimer (between 2.0 and 5.0 ppm). The absence of signals around 7 ppm indicates that all maleimide groups were functionalized. The spectra were acquired on a Bruker Avance 600 MHz spectrometer equipped with a 5 mm TXI inverse probe. (b) Representative atomic force microscopy (AFM) height images of the nanopatterns of RGD-functionalized dendrimers on PLLA ( $5 \times 5 \mu\text{m}$ ). (c) Minimum interparticle distance ( $d_{\min}$ ) probability contour plots, showing high-density RGD regions in dark red ( $d_{\min} < 70$  nm). Dendrimers localization is superimposed in black for clarity. (d) Percentage of area with  $d_{\min} < 70$  nm obtained for nanopatterns of high ( $S_{90}$ ) and low ( $S_{18}$ ) local surface adhesiveness.

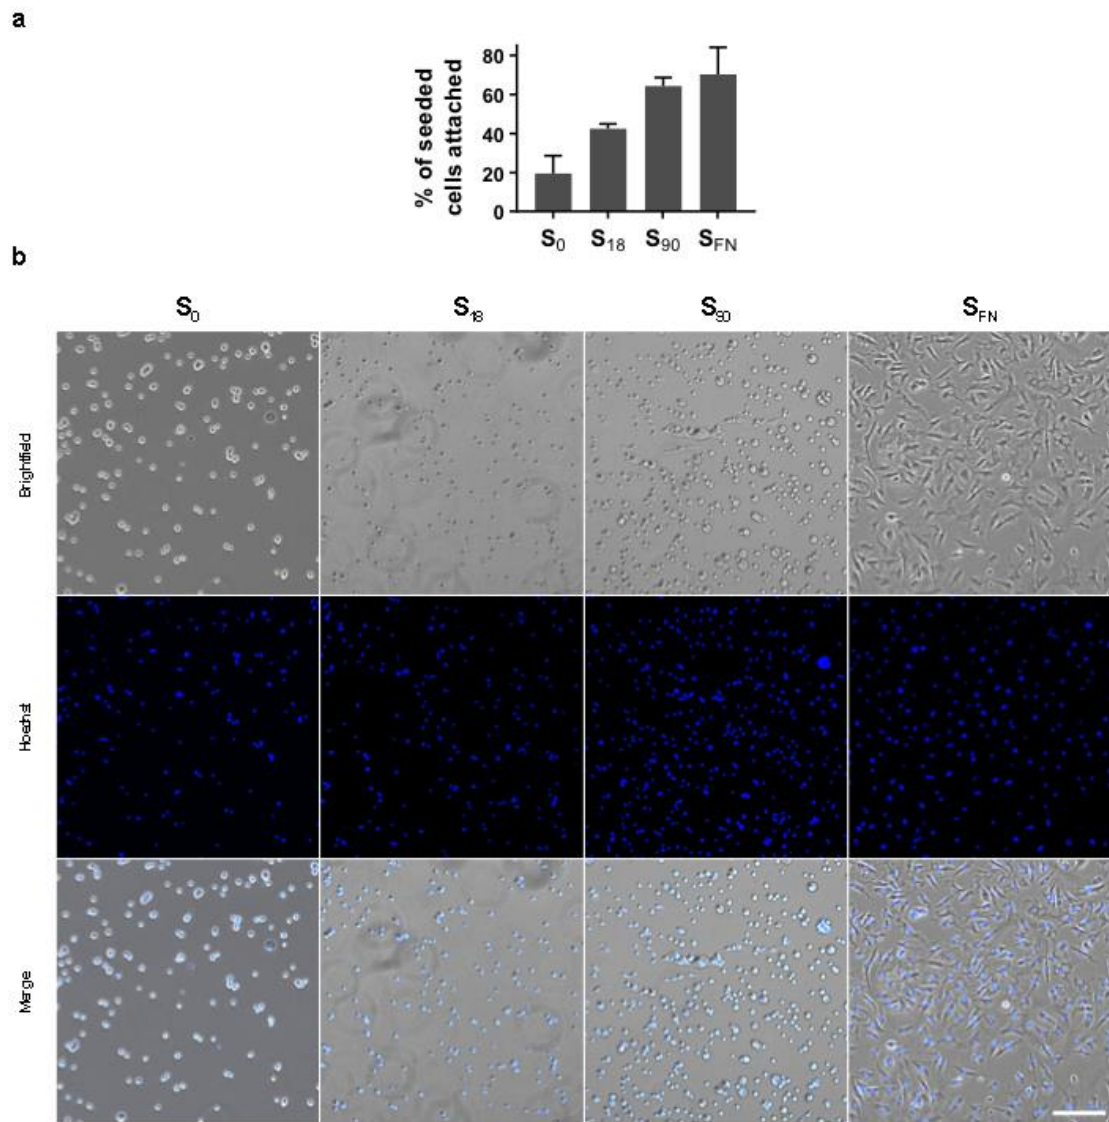

**Figure S2.** Initial cell adherence on the substrates. (a) Plot of the percentage of adhered cells 2 h after cell seeding.  $N = 2$ . Results are given as the mean  $\pm$  SE. (b) Representative images of the adhered cells. Scale bar = 200  $\mu\text{m}$ .

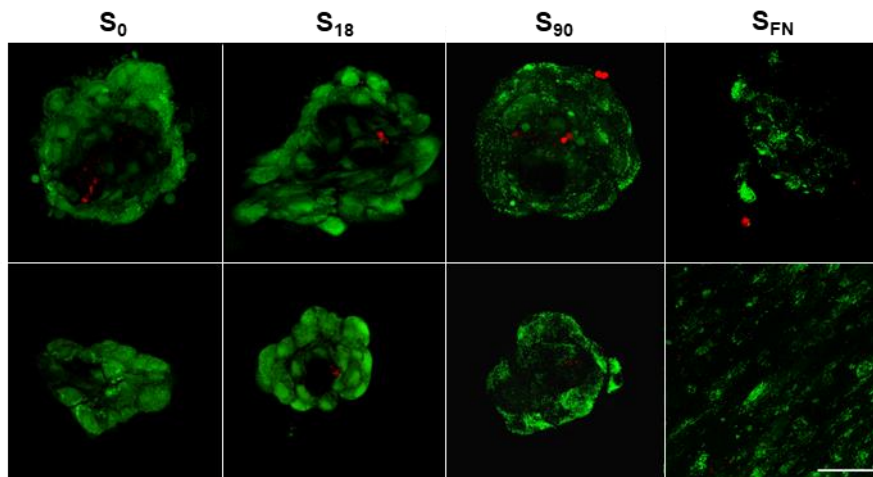

**Figure S3.** Cell viability assay. Samples at day 7 of chondrogenesis were stained for intracellular esterase activity, indicating live cells (green), and for nucleic acids in membrane-damaged cells (red). Two representative images are shown for each condition. Scale bar = 50  $\mu\text{m}$ .

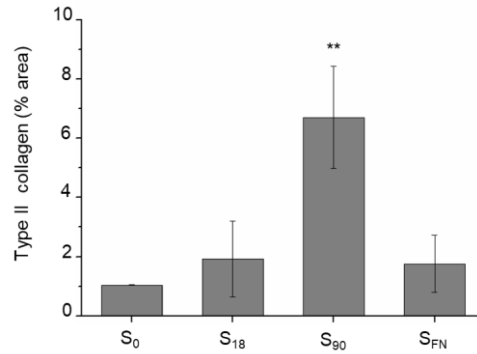

**Figure S4.** Type II collagen quantification. Plot of the percentage of COL2A1-stained areas in the confocal z-projections, normalized to the area of the condensate after 5 days of chondrogenic induction.  $N \geq 3$ . Results are given as the mean  $\pm$  SE. The Type II collagen expression in S<sub>90</sub> nanopatterns is significantly higher than in the rest of the samples.

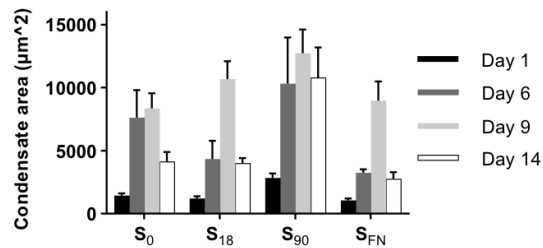

**Figure S5.** Condensate areas obtained from confocal image projections at different time points of chondrogenesis.  $N \geq 3$ . Results are given as the mean  $\pm$  SE. Condensates on S<sub>90</sub> grow larger and are more stable in time than those on the other substrates.
